# Supplementary material for: TGF-β regulates LARG and GEF-H1 during EMT to affect stiffening response to force and cell invasion
Source: PubMed Central journal article supplement — Mol Biol Cell. 2014 Nov 5;25(22):3528–40. doi: 10.1091/mbc.E14-05-1015 (PMC4230614; doi:10.1091/mbc.e14-05-1015), 2014-11-05

# Supplemental Materials

*Molecular Biology of the Cell*

Osborne et al.

**Supplementary Figure. 1. Compliance signatures, stiffness and stiffness response of TGF- $\beta$  induced EMT in PANC-1s, stiffness response of PDL-coated beads, and integrin levels during EMT**

(A, B) Compliance signatures in full, non-stacked form, for representative examples of (A) cell stiffening and (B) cell softening. The stacked form of these plots are provided in Fig. 1C and 1D.

(C) PANC-1 cells were treated with (XXX amount) TGF- $\beta$  for 72 hours to induce EMT. Average PANC-1 cell stiffness for untreated (n = 86) and TGF- $\beta$  treated cells (n = 54). \*\* denotes stiffness difference relative to untreated cells at the  $p < 0.01$  level.

(D) Average PANC-1 stiffness response for untreated (n = 20) and TGF- $\beta$  treated (n = 10) cells. # denotes stiffness difference of  $G_x$  from  $G_1$  at the  $p < 0.05$  level.

\* denotes stiffness response ( $G_x/G_1$ ) difference between conditions at the  $p < 0.05$  level. (Error bars represent SEM, data was collected from 3 independent experiments)

(E) Average stiffness response for NMuMG cells incubated with FN-coated (n = 30) or PDL-coated (n = 14) beads. # denotes stiffness difference of  $G_x$  from  $G_1$  at the  $p < 0.05$  level. \* denotes stiffness response ( $G_x/G_1$ ) difference between conditions at the  $p < 0.05$  level. (Error bars represent SEM, data was collected from 3 independent experiments)

(F) Protein expression level of  $\beta_1$  and  $\alpha_5$  integrin's in NMuMG cells with or without TGF- $\beta$  treatment. Quantitation of levels from three independent trials is shown below. NS = No statistical difference.

**Supplementary Fig. 2. The rotating permanent magnet device**

(A) Picture and schematic of the rotating magnet device. A DC motor was used to rotate a custom made, axially magnetized, 120-degree arc magnet at 4 revolutions per minute to generate a time varying force of the desired duty cycle and frequency. The footprint of the magnet was designed to lower into a standard 10 cm cell culture dish.

(B) COMSOL simulation of the force regimen over 2 min for the rotating magnet device at a height of 16 mm and at half-radius in the specimen dish.

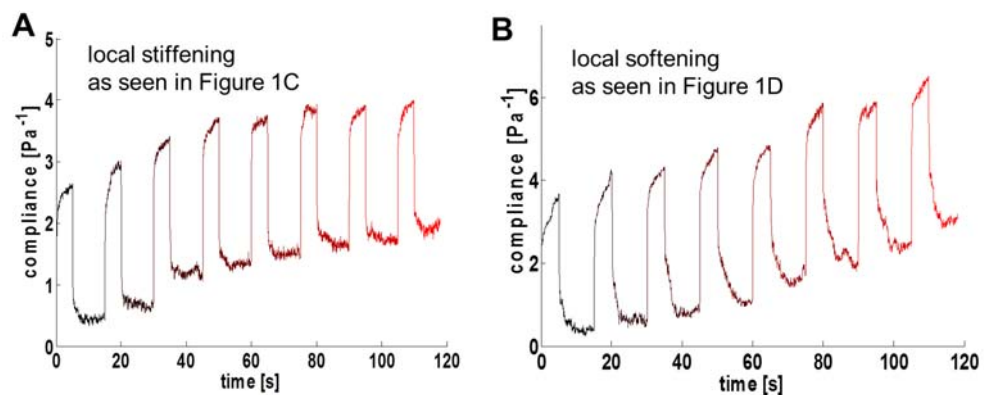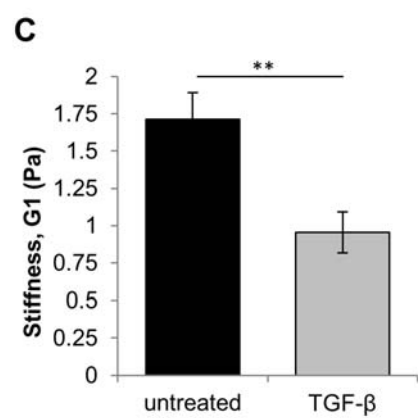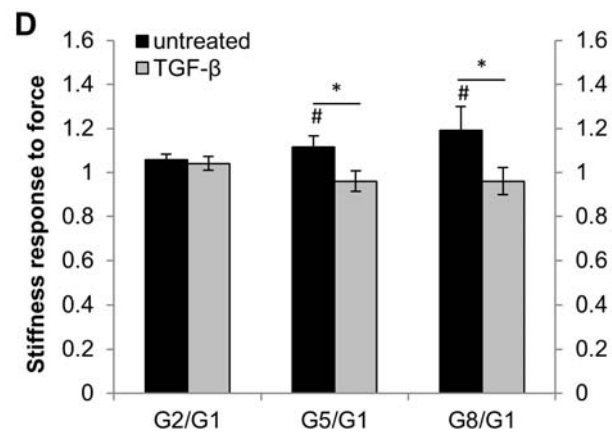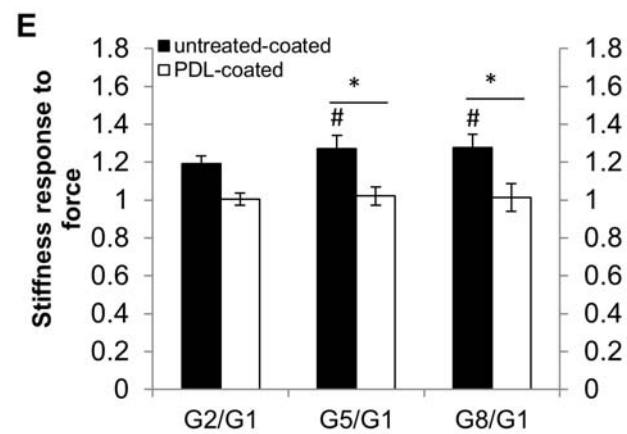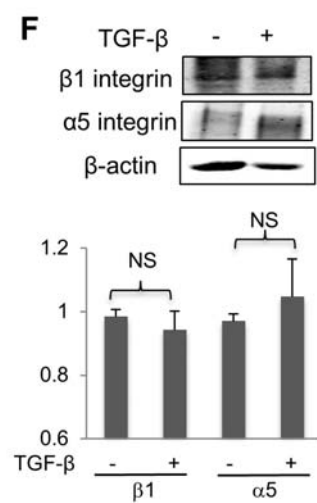

**A**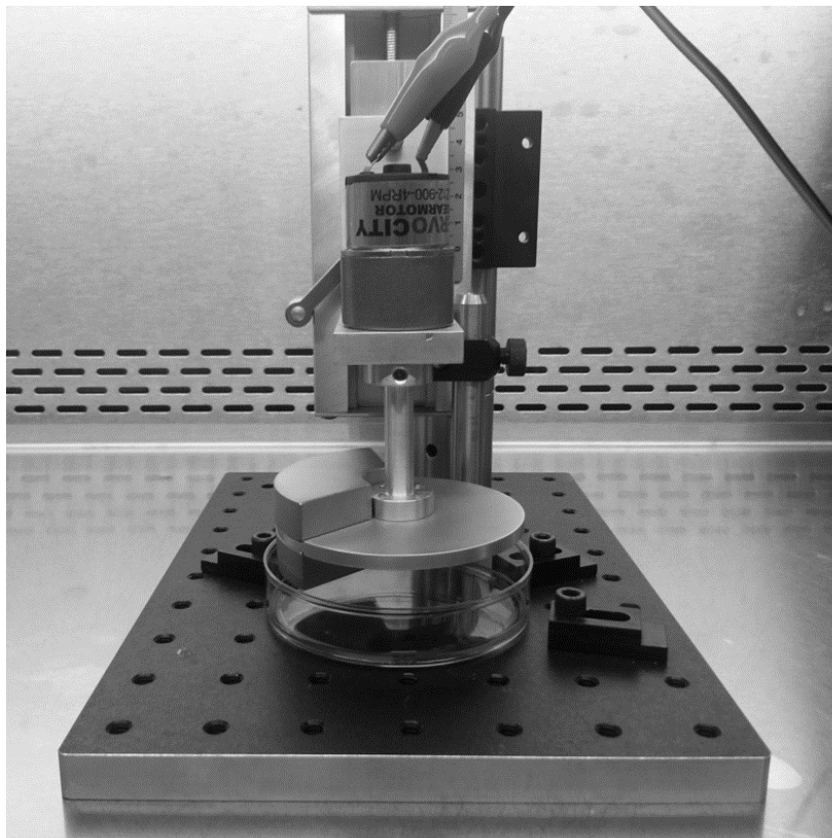**B**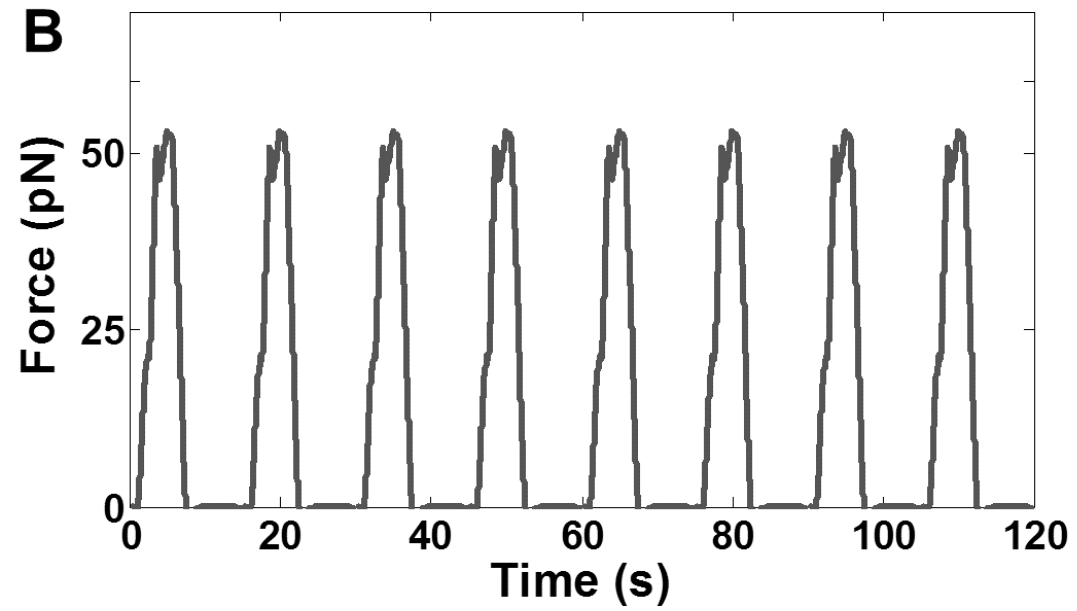

Supplement: supp_E14-05-1015v1_CombinedSupMats.pdf [file supp_E14-05-1015v1_CombinedSupMats.pdf]
